# Supplementary material
Source: Research Square preprint supplement (doi:10.21203/rs.3.rs-8167722/v1)
Supplement: Supplementary file 1 [file b04399d365eec7587b40aff4.docx]

**Perspective-taking and meaning-making among public policy professionals experiencing an immersive poverty narrative**

**Supplementary Materials**

**Table S1:**

*Thematic codebook for focus group analysis: Themes, sub-codes, and representative quotes (N=47)*

| **THEME 1: EMOTIONAL AND PSYCHOLOGICAL RESPONSES** | | |
| --- | --- | --- |
| **Definition:** Captures participants' affective and psychological reactions to the simulation experience, including stress responses, anxiety, empathic engagement with virtual characters, and emotional responses to family dynamics portrayed in the narrative. | | |
| **Sub-code** | **Definition** | **Quote** |
| Stress manifestation | Participants describe experiencing stress that cascades across multiple life domains simultaneously, creating overwhelming pressure. This includes descriptions of stress spreading, accumulating, or affecting multiple aspects of life at once. | *“Yes, these aren't just financial worries but also concerns about your children and everything else. It’s like an oil spill” (FG5 P4)* |
| Administrative anxiety and information avoidance | Participants describe anxiety triggered by administrative tasks, bureaucratic materials, or official correspondence, leading to avoidance behaviors such as not opening mail, not answering phones, or delaying form completion. | *“Going through the information only made things more negative. It increased my insecurity and made me question my self-worth (FG3 P8)* |
| Empathic response to virtual family | Participants demonstrate emotional investment in and concern for virtual family members' wellbeing, particularly children. Includes expressions of care, heartbreak, protective instincts, and emotional resonance with family members' suffering. | *"But then there's the call from school saying things aren't going well, and of course, that's because of the home situation. That was the most heartbreaking part, seeing how much the children are affected by it” (FG3 P7)* |
| Partner perception | Participants' emotional and relational responses to the virtual partner character, including feelings of wanting to support them, frustration with their behavior, or concern about relationship dynamics under financial stress | *“My partner is no longer in the right mindset. Accepting defeat only adds more pressure and stress” (FG1 P4).*  *“I wanted to put my arm around my partner. I wanted to provide support” (FG4 P1).* |
| **THEME 2: SALIENT ELEMENTS OF FINANCIAL DECISION-MAKING** | | |
| **Definition:** Captures the factors, constraints, and considerations that shaped participants' financial choices within the simulation. Includes barriers to rational decision-making (administrative complexity, time pressure, incomplete information) and competing priorities (child welfare vs. financial stability, immediate needs vs. long-term planning). | | |
| **Sub-code** | **Definition** | **Quote** |
| Administrative system complexity | Participants describe bureaucratic systems, forms, and administrative processes as incomprehensibly complex, creating barriers even for educated professionals. Includes recognition that system design itself prevents access to resources. | *“Yeah, how complex have we made things in the Netherlands? None of us can really deal with this.” (FG5 P3)* |
| Child welfare prioritization | Participants prioritize children's social and emotional wellbeing over financial rationality, making decisions they recognize as financially unsustainable to protect children from social exclusion or emotional harm. | *"For yourself, you can manage things. Put on a sweater or use a blanket. But for your children, it’s really complicated." (FG3 P2)* |
| Immediate versus long-term consequences | Participants face decisions with incomplete information about future outcomes, forcing prioritization of immediate visible needs over uncertain long-term consequences. Includes recognition of temporal uncertainty and constrained rationality | *“My daughter wants to go to Rome, and I think, 'Yes, she should go.' When making that decision, I’m thinking 'I actually have no idea whether this is possible, but I want her to go. So, I guess we'll cross that bridge when we come to it” (FG1 P1).* |
| **THEME 3: NARRATIVE CONSTRUCTION AND DECISION PROCESSES** | | |
| **Definition:** Captures how participants engaged with and made sense of the simulation narrative, including their level of immersion, how they constructed stories to justify decisions, the roles they inhabited, and shifts in their explanatory frameworks from individual agency to structural critique. | | |
| **Sub-code** | **Definition** | **Quote** |
| Observer to participant immersion transition | Participants initially maintain awareness of the simulation's artificiality but gradually become psychologically immersed, shifting from external observation to experiencing events from within the narrative perspective. | *"I kept thinking, you know this isn't real. But toward the end that started to fade, and I felt completely immersed"(FG2 P3).* |
| Identity protective narrative frameworks | Participants construct narratives that protect their sense of identity and agency by framing decisions through their various social roles (parent, partner, responsible adult), attempting to maintain coherence across multiple identity demands under constraint. | *“It affects you as a person: as a mother, as a partner, in every role you have when dealing with debt” (FG1, P8)* |
| Support system importance | Participants recognize the critical role of social networks and support systems in managing financial hardship, noting when support is present, absent, or when isolation compounds difficulties. | *“This partner only gives me stress. I miss a bit of network here, this is worrisome” (FG1 P6).* |
| Agency to systematic critique evolution | Participants shift from narratives emphasizing personal control and problem-solving capacity to recognizing systemic barriers that exceed individual agency, marking the transition from individual-responsibility to structural-critique frameworks. | *“This gave a feeling of losing the overview, I felt powerless. The time of resources is over” (FG4 P6).* |
| **THEME 4: PROFESSIONAL PERSPECTIVES ON VR AND ITS EFFECTIVENESS** | | |
| **Definition:** Captures participants' reflections on the simulation as a professional training tool, including comparisons to traditional methods, recognition of their own professional biases and assumptions, and evaluation of VR's potential applications in their field. | | |
| **Sub-code** | **Definition** | **Quote** |
| Immersion versus traditional methods | Participants contrast the experiential, embodied nature of VR simulation with traditional information-based training methods (reading, lectures, case studies), noting that immersive experience created different and more impactful understanding. | *“You hear it often, and now I really had an active role in solving it” (FG3 P7).* |
| Professional bias recognition | Participants identify their own occupational assumptions, solution-focused orientations, and professional frameworks that create distance from client realities, recognizing how expertise can function as interpretive barrier. | *“We tend to think quickly about solutions, but that mindset has become our everyday reality”* (*FG3 P6).* |
| Application for training | Participants evaluate VR's potential utility for professional training, colleague development, or broader organizational learning, suggesting specific applications or populations who would benefit. | *“This would be ideal for giving people an experience, even for training purposes. To get to experience what people actually go through?” (FG5 P2).* |

*Note.* Themes were derived using Braun & Clarke’s (2006) thematic analysis approach.

**Table S2:**

*Thematic codebook for five-week follow-up survey: Sustained impacts (n=15)*

| **THEME 1: PERSISTENT SCENE MEMORABILITY** | | |
| --- | --- | --- |
| **Definition:** Captures specific moments, decisions, and scenarios from the simulation that remained vivid in participants' memories five weeks after the experience, revealing which elements had lasting psychological impact. | | |
| **Sub-code** | **Definition** | **Quote** |
| Memorable decision moments | Specific high-stakes choices that participants vividly recalled weeks later, particularly decisions involving impossible trade-offs between competing essential needs (child welfare vs. financial stability, immediate vs. future needs). | *“The choice whether your child could go along on the school trip. With that, I immediately thought 'then we'll just eat bread for the coming week, but I want to grant that to my child'*" (P5). |
| Core emotional states | Emotionally intense moments that participants recalled in detail, particularly scenes of escalating family stress, feelings of helplessness, or recognition that no solution exists. | *“Sitting at the kitchen table with my partner, talking about our worries, the panic, the school calling about our daughter, and feeling like there's no way out* " (P12). |
| Systemic and bureaucratic barriers | Persistent memories of encountering administrative complexity and experiencing incompetence when attempting to navigate bureaucratic systems, particularly the contrast between professional identity and inability to complete forms. | "*Also filling out the form which turned out to be quite difficult, which gave me a feeling of incompetence while as a professional I should certainly be able to do that*" (P8). |
| **THEME 6: SUSTAINED CHANGES IN PRACTICE AND PERSONAL AWARENESS** | | |
| **Definition:** Captures lasting impacts of the simulation on participants' professional practice, personal awareness, and daily interactions five weeks after the experience, including changes in empathy, listening practices, and critical awareness of systemic issues. | | |
| **Sub-code** | **Definition** | **Quote** |
| Heightened empathy and motivation | Sustained increases in participants' emotional understanding, awareness of their own privilege, and professional motivation to support clients experiencing financial hardship | *I've become more aware of how privileged I am but also recognize the insecurity that such a situation brings. My motivation has increased as a result” (P11)* |
| Ongoing self-reflection | Sustained changes in professional practice including more attentive listening, asking deeper questions to understand client contexts, and greater reflection on one's own assumptions and responses. | *“I listen more, and I ask to get to know the story behind a question […] and by asking more, I acquired a good look on the situation, and I could report this back and resolve the conflict” (P7).* |
| Increased systemic awareness | Sustained critical awareness of structural barriers, questioning whether organizational systems serve clients well, and ongoing attention to how policies and procedures may disadvantage vulnerable populations. | *“I notice that I pay a lot of attention to similar experiences in my work and constantly wonder if we as a municipality can do better” (P11).* |

*Note***:** Themes were derived using Braun and Clarke’s (2006) six-step thematic analysis. These two themes come from longitudinal follow-up data (n=15) rather than focus groups (n=47)
